# Supplementary material for: PsrA controls the synthesis of the Pseudomonas aeruginosa quinolone signal via repression of the FadE homolog, PA0506
Source: PubMed Central journal article supplement (PMC5722320; doi:10.1371/journal.pone.0189331), 2017-12-08
Supplement: pone.0189331.s005.pdf [file pone.0189331.s005.pdf]

## Supplemental Table 1. Primers utilized in these studies.

| Primer                      | Sequence (5'→3') <sup>a</sup>                       |
|-----------------------------|-----------------------------------------------------|
| <b><i>psrA</i> Mutation</b> |                                                     |
| <i>psrA</i> Up1             | AAA <u>ACTGCAGCT</u> GAATATCACCCCGTCGAACTTCAGC      |
| <i>psrA</i> Up2             | CTCGATGCGGGCGCAACTGCTGTTCAACAAGACGCCCGCCAAGGCCTGA   |
| <i>psrA</i> Down1           | TCAGGCCTTGCGGGCGCTTTGTTGAACAGCTGTTCCGCCGCATCGAG     |
| <i>psrA</i> Down2           | AAA <u>ACTGCAGCT</u> GTTCGATGACATCGTCGAGCAAGGGT     |
| <b>PA0506 Mutation</b>      |                                                     |
| 0506 Up1                    | AAAAAAAGCTTGCTGTATCAACCATGCGCTG                     |
| 0506 Up2                    | CTCCATCAGGTTGTTGGCCAGCAGCTCGTCGCGAAC                |
| 0506 Down1                  | GTTTCGCGACGAGCTGCTGGCCAACAACCTGATGGAG               |
| 0506 Down2                  | AAAAAAAGCTTGCCAGCACCAGGTGGACGAT                     |
| <b>PA0507 Mutation</b>      |                                                     |
| 0507 Up1                    | AAAAAAAGCTTATCATCGTGCATCCTGACG                      |
| 0507 Up2                    | CTTGGCTTCGTAGAACGCGTCCGGGGTCGCGTCGCT                |
| 0507 Down1                  | AGCGACGCGACCCCGGACGCGTTCTACGAAGCCAAG                |
| 0507 Down2                  | AAAAAAAGCTTGGTGATGAAGATCTTGGT                       |
| <b>PA0508 Mutation</b>      |                                                     |
| 0508 Up1                    | AAAAAAAGCTTTACTTCACCGCCCAGTTGCTCG                   |
| 0508 Up2                    | GGTGCGCGCCATCAATGCCTCGGCGTCGACCACTTC                |
| 0508 Down1                  | GAAGTGGTCGACGCCGAGGCATTGATGGCGCGCACC                |
| 0508 Down2                  | AAAAAAAGCTTGCCCTAACACGCGCAACCTGG                    |
| <b>Gene Expression</b>      |                                                     |
| PsrA Up                     | AAAAGAGCTCTCAGGCCTTGGCGGG                           |
| PsrA Down                   | AAAACCATGGCCCAGTCGGAAACC                            |
| PA0506 Up                   | AAAAAGAGCTCATGCCTGATTACAAGG                         |
| PA0506 Down                 | AAAAAAAGCTTTCAGTAACCGAGGGCGAA                       |
| PA0507 EXPR F               | AAAAGAGCTCATGCCGGAATACAAGGCT                        |
| PA0507 EXPR R               | AAA <u>ACTGCAGCT</u> AGAGCGAAA <u>ACTGCTCCGCCGA</u> |
| PA0508 EXPR F               | AAAAAGAGCTCATGGCTGATTACAAAGCTCCG                    |
| PA0508 EXPR R               | AAA <u>ACTGCAGT</u> CAGAACTGCTCGGCGTCCAG            |
| FadAB5 EXPR F               | AAAAAAAGCTTTTAGATGCGCTCGAAGACGG                     |
| FadAB5 EXPR R               | AAAAGAGCTCATGATTTACCAAGGTAAG                        |
| <b>RT-PCR</b>               |                                                     |
| PA0505 RT-F                 | GTCATCGAGGTAGCCGACGAGA                              |
| PA0506 RT-R                 | TGCGCTTCGTAGCCCAGCAGCTCG                            |
| PA0506 RT-F                 | ATGCTGTCCGGCGCCAACAACCTGAT                          |
| PA0507 RT-R                 | GTCGAATACCTCATCGATCAGGA                             |
| PA0507 RT-F                 | GGCGGGCCTGATGAGCCTGTCGGCG                           |
| PA0508 RT-R                 | AGAGCCGGGAGACCTCGAACA                               |
| PA0505 RT-C-F               | GGCACCAAGATCTTCATCTCCG                              |

|               |                                |
|---------------|--------------------------------|
| PA0506 RT-C-R | GAAGGTGAACATGCAGTTCAGGC        |
| PA0506 RT-C-F | GAAGATATTCATCTCCGCCGGCGAG      |
| PA0507 RT-C-R | GGCGTGGTTCATCATGGTGAACATG      |
| PA0507 RT-C-F | GCGATGTTCCACCATGATGAACTACGAGCG |
| PA0508 RT-C-R | GTCTTCGCTGTACTTGGCGGTGTCCAG    |

### EMSA

|                        |                                   |
|------------------------|-----------------------------------|
| <i>psrA</i> promoter F | AAAAAAAAAGCTTCAGCTGTTCCGCCGCATCGA |
| <i>psrA</i> promoter R | AAAAACTCGAGGTCGTCGCTCTGTGTTTTTA   |
| <i>kynA</i> promoter F | GAGTGAGGGCAAGGACACAT              |
| <i>kynA</i> promoter R | CGCGAGTGATCCGAAATTCG              |
| PA0506 EMSA F          | GACCCTTCCTTTTCCGACTGTCA           |
| PA0506 EMSA R          | GAAACGGATATCACGCAA                |
| PA0507 EMSA F          | AGGTGAGAAAGAGCCCGCCCTT            |
| PA0507 EMSA R          | CTCATCGATCAGGAAGCGCATGTC          |
| PA0508 EMSA F          | GCTCAGCGGCTGCCGGGGCAG             |
| PA0508 EMSA R          | GACCTCGAACACCTCATTGAG             |

### *psrA* sequencing

|                   |                      |
|-------------------|----------------------|
| <i>psrA</i> seq F | ACGGGCCTCAGACAGCGCAC |
| <i>psrA</i> seq R | ACGGGCCTCAGACAGCGCAC |

### Quantitative Real Time-PCR

|             |                                    |
|-------------|------------------------------------|
| PqsA rt 1   | GCCCTTTGCTCGACGATTTCTCG            |
| PqsA rt 2   | AACCCGAGGTGTATTGCAGGAAACA          |
| LasR rt 1   | CCTTCATCGTCGGCAACTA                |
| LasR rt 2   | GGACGGTTCCCAGAAAATC                |
| PA0506 rt 1 | CTTGCGTGATATCCGTTTC                |
| PA0506 rt 2 | CACCTGTTCGCAGAACTT                 |
| PA0507 rt 1 | GATGAAGGGTCGAAATTCTG               |
| PA0507 rt 2 | GTGCATAGGCTTCCTTGAAA               |
| PA0508 rt 1 | GTCGAGGAACTGGTCAACTC               |
| PA0508 rt 2 | CAGGTA <sup>a</sup> CTTGTCTTCAGTTC |
| ClpX rt 1   | CCTGTGCAATGACATCATCC               |
| ClpX rt 2   | AGGATGGTGCGGATCTCTTT               |
| PqsH rt 1   | ATGCCGTTGGCCGGCATCAA               |
| PqsH rt 2   | ACGATGGAGACCCCGACCCG               |
| PqsR rt 1   | ATTGCGCGGACCCTTGTTGA               |
| PqsR rt 2   | GGACGGCTACAAGGTCTGAAC              |

---

<sup>a</sup>Underlined sequence denotes restriction site utilized for cloning.
